# Supplementary material for: Enforcing Database Recoverability on Disks that Lack Write-Through
Source: Royal Society of Chemistry journal article supplement (doi:10.1039/c8sm01482e), 2008-03-01
Supplement: c8sm01482e1.pdf [file c8sm01482e1.pdf]

# Smart Low Molecular Weight Hydrogels with Dynamic Covalent Skeleton

Panpan Sun,<sup>a</sup> Shujing Ren,<sup>a</sup> Fenglin Liu,<sup>c</sup> Aoli Wu,<sup>a</sup> Na Sun,<sup>a</sup> Lijuan Shi<sup>\*b</sup> and

Liqiang Zheng<sup>\*a</sup>

<sup>a</sup>*Key Laboratory of Colloid and Interface Chemistry, Shandong University, Ministry  
of Education, Jinan 250100, P. R. China*

<sup>b</sup>*Key Laboratory of Coal Science and Technology of Ministry of Education and  
Shanxi Province, Taiyuan University of Technology, Taiyuan 030024, P. R. China*

<sup>c</sup>*Department of Chemical and Materials Engineering University of Alberta Edmonton,  
Alberta, T6G 1H9, Canada; E-mail address: fenglin1@ualberta.ca*

---

*Corresponding author:*

*Dr. Liqiang Zheng*

*E-mail address: [lqzheng@sdu.edu.cn](mailto:lqzheng@sdu.edu.cn)*

*Key Laboratory of Colloid and Interface Chemistry, Shandong University, Ministry of  
Education, Jinan 250100, China*

*Phone number: +86-531-88366062*

*Fax number: +86-531-88564750*

## Experimental section

### Synthesis of 3-(2-(4-formylphenoxy) ethyl)-1-methyl imidazolium bromide (MA).

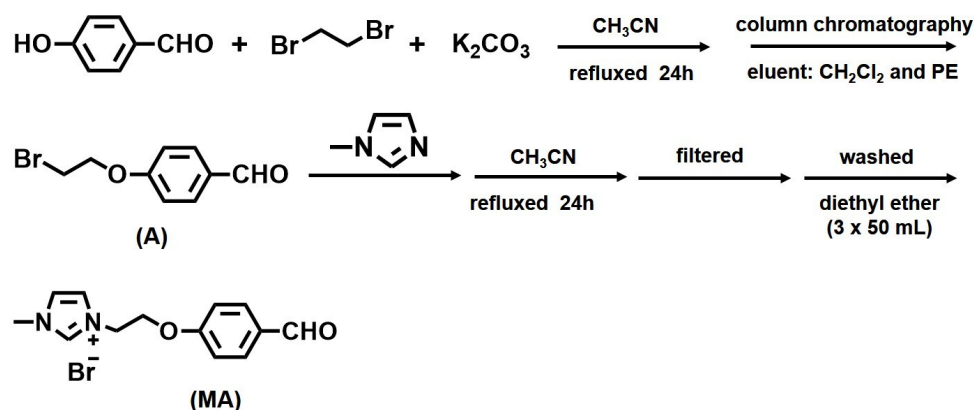

Scheme S1. The synthesis route for MA.

The  $^1H$  NMR (300 MHz,  $CDCl_3$ ) of compound A:  $\delta H$  / ppm 3.67 (t, 2H), 4.38 (t, 2H), 7.04 (d, 2H), 7.89 (d, 2H), 9.90 (s, 1H).  $^{13}C$  NMR (75.46 MHz,  $CDCl_3$ ):  $\delta C$  / ppm 31.53, 68.57, 115.51, 130.43, 132.30, 163.27, 191.80. MS: ( $[C_9H_9BrO_2+H]^+$ )  $m/z = 228.9859$ , found  $m/z = 228.9836$ .

The  $^1H$  NMR (300 MHz,  $D_2O$ ) of MA:  $\delta H$  / ppm: 3.77 (s, 3H), 4.42 (t, 2H), 4.56 (t, 2H), 7.02 (d, 2H), 7.32 (s, 1H), 7.48 (s, 1H), 7.78 (d, 2H), 9.65 (s, 1H).  $^{13}C$  NMR (75.46 MHz,  $D_2O$ ):  $\delta C$  / ppm 35.80, 48.78, 66.27, 115.11, 122.73, 123.63, 129.73, 132.67, 163.22, 194.78. MS: ( $[C_{11}H_{15}N_2O_2]^+$ )  $m/z = 232.21$ , found  $m/z = 231.1162$ .

### Synthesis of 3, 3'-dithiobis (propionohydrazide) (DSPDZ).

$^1H$  NMR (300 MHz, DMSO) of DSPDZ:  $\delta H$  / ppm: 9.07 (s, 1H), 4.22 (s, 2H), 2.89 (t, 2H), 2.42 (t, 2H).

## Additional Results

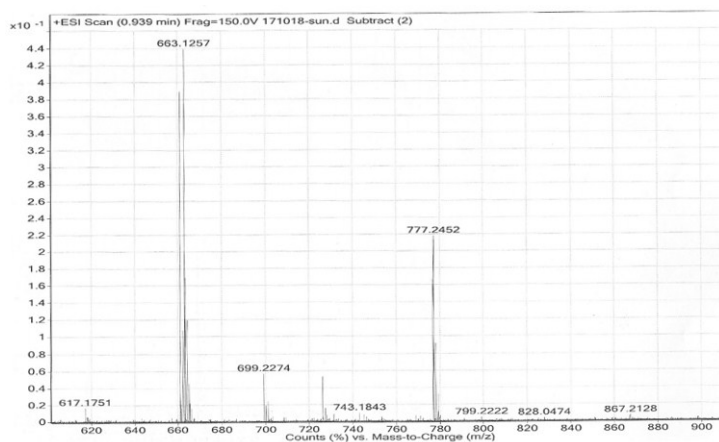

Fig. S1 ESI-MS profile of the low molecular weight supra-gelator (BMBS).

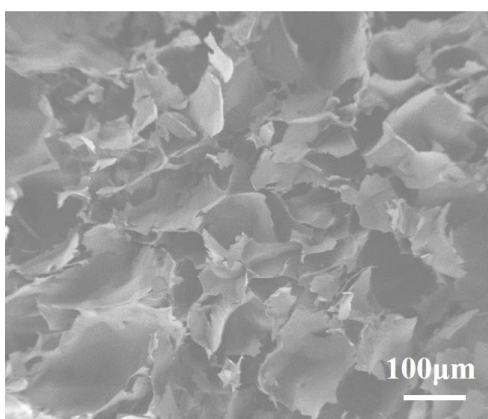

Fig. S2 SEM image of BMBS hydrogel prepared from MA (100 mM) and DSPDZ (50 mM).

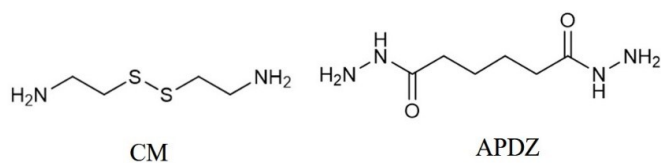

Scheme S2. Chemical structures of CM and APDZ.

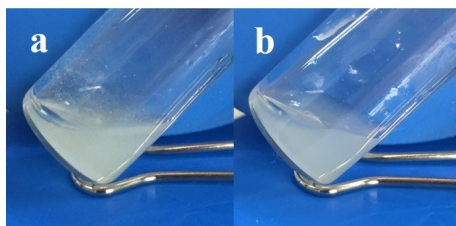

Fig. S3 Photographs of the solutions of MA and CM (a); APDZ (b).

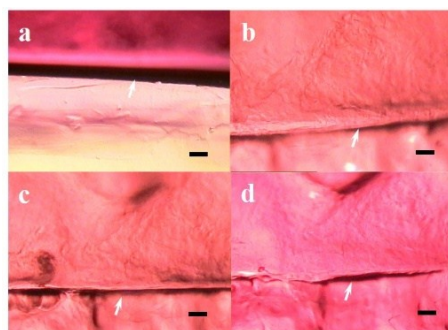

Fig. S4 Optical microscope images of the self-healing process of BMBS hydrogels (MA, 100 mM and DSPDZ, 50 mM). 1) 0, b) 3, c) 6 and d) 12 hours, respectively. White arrows indicate the positions of cut gaps on the hydrogel samples. Scar bars: 100 μm.

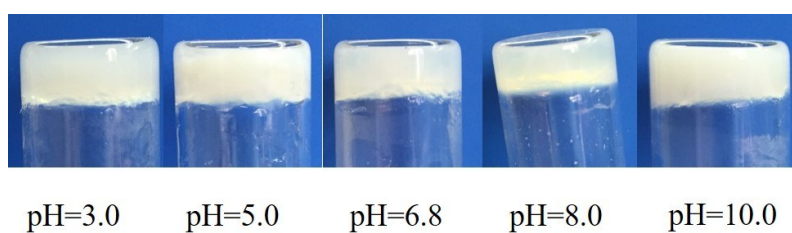

Fig. S5 Photographs of the resultant hydrogels by the precursor of MA and DSPDZ with different pH.

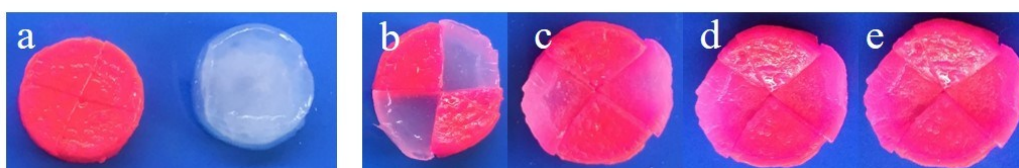

Fig. S6 Two disk-shaped hydrogels (the one on the left stained with

rhodamine B dye) were cut into 4 pieces and put together alternately. (b-e)

Photos were taken after 0, 3, 6 and 12 hours.
